# Supplementary material for: The application of del Nido cardioplegia for myocardial protection in adult coronary artery bypass grafting: a cohort study
Source: PubMed Central journal article supplement — J Thorac Dis. 2022 Jan;14(1):177–84. doi: 10.21037/jtd-21-1965 (PMC8828514; doi:10.21037/jtd-21-1965), 2022-01
Supplement: jtd-14-01-177-dss.pdf [file jtd-14-01-177-dss.pdf]

## Data Sharing Statement

|                     |                                                                                                                                                     |                                                                                                                 |
|---------------------|-----------------------------------------------------------------------------------------------------------------------------------------------------|-----------------------------------------------------------------------------------------------------------------|
| <b>Article Info</b> | <a href="https://dx.doi.org/10.21037/jtd-21-1965">https://dx.doi.org/10.21037/jtd-21-1965</a>                                                       |                                                                                                                 |
| <b>Item</b>         | <b>Question</b>                                                                                                                                     | <b>Authors' Response<br/>(place "-" if not applicable)</b>                                                      |
| 1                   | Would you like to share data collected for your study to others?                                                                                    | No.                                                                                                             |
| 2                   | If not, would you like to share the reason for your decision?                                                                                       | The research is still ongoing.                                                                                  |
| 3                   | What data in particular will be shared?                                                                                                             | -                                                                                                               |
| 4                   | Any other documents will be shared? Such as study protocol, statistical analysis plan, informed consent form, clinical study report, analytic code. | Statistical analysis.                                                                                           |
| 5                   | When will data availability begin?                                                                                                                  | From publication.                                                                                               |
| 6                   | When will data availability end?                                                                                                                    | Two years within the publication date, since the technique or survival date may be updated overtime.            |
| 7                   | To whom will you share the data?                                                                                                                    | Surgeons, cardiologist, and other researchers of cardio surgery.                                                |
| 8                   | For what type of analysis or purpose?                                                                                                               | To compare clinical results and long-term outcomes.                                                             |
| 9                   | How or where can the data/documents be obtained?                                                                                                    | Under request to corresponding author.                                                                          |
| 10                  | Any other restrictions?                                                                                                                             | We may balance the potential benefits and risks for each request and then provide the data that could be shared |
